# Supplementary material for: The signature of fine scale local adaptation in Atlantic salmon revealed from common garden experiments in nature
Source: PubMed Central journal article supplement (PMC4610385; doi:10.1111/eva.12299), 2015-09-11
Supplement: eva0008-0881-sd1.pdf [file eva0008-0881-sd1.pdf]

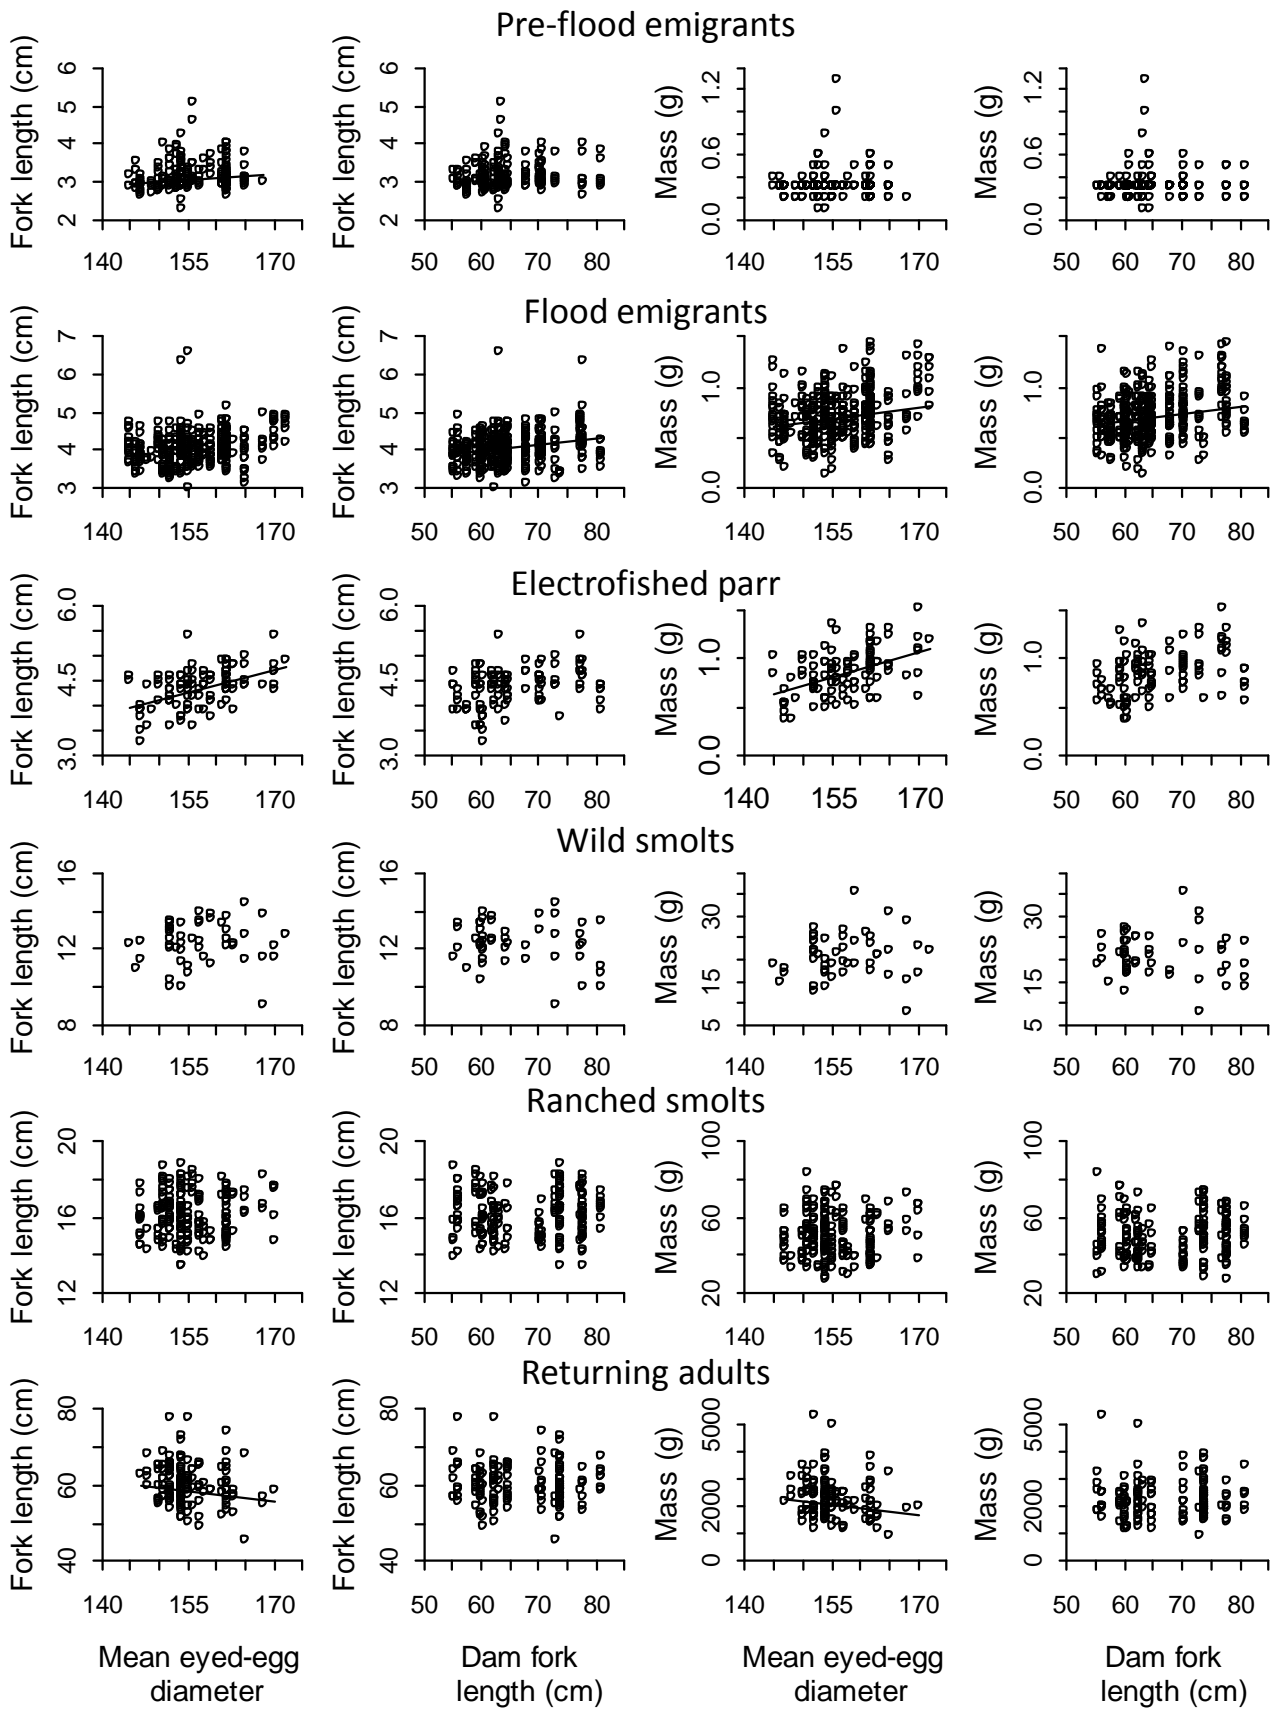

**Fig. S1:** Progeny fork length and mass versus mean eyed-egg diameter and dam fork length, plotted separately for each life/sampling stage. Top row of panels: pre-flood emigrants. Second row from top: flood emigrants. Third row from top: electrofished parr. Third row from bottom: wild smolts. Second row from bottom: hatchery-produced ranched smolts. Bottom row: returning adults. Lines show predicted effects from LMMs, where significant.
