# Supplementary material for: The signature of fine scale local adaptation in Atlantic salmon revealed from common garden experiments in nature
Source: PubMed Central journal article supplement (PMC4610385; doi:10.1111/eva.12299), 2015-09-11
Supplement: eva0008-0881-sd2.pdf [file eva0008-0881-sd2.pdf]

## Appendix I: Broodstock details

| <b>Local (Burrishoole) Females</b>    |                    |      |      |            |       |      |       |       |       |            |            |       |            |       |
|---------------------------------------|--------------------|------|------|------------|-------|------|-------|-------|-------|------------|------------|-------|------------|-------|
| Sample Code                           | BF_1               | BF_2 | BF_3 | BF_4       | BF_5  | BF_6 | BF_7  | BF_8  | BF_9  | BF_11      | BF_12      | BF_14 | BF_13      |       |
| Date Stripped                         | 22/12/2008         |      |      |            |       |      |       |       |       | 29/12/2008 |            |       | 14/1/2009  |       |
| Fork length (cm)                      | 60.0               | 77.2 | 59.2 | 73.2       | 57.5  | 63.1 | 60.4  | 63.5  | 57.7  | 64.5       | 81.0       | 56.3  | 74.0       |       |
| Sea age                               | 1SW                | 2SW  | 1SW  | 2SW        | 1SW   | 1SW  | 1SW   | 2SW   | 1SW   | 2SW        | 2SW        | 1SW   | 2SW        |       |
| TOTAL n(eggs) per hen                 | 3352               | 3844 | 3123 | 3379       | 1047* | 4026 | 2696  | 1738* | 2474  | 3659       | 5053       | 3602  | 6931       |       |
| Total n(eggs) stripped                | 3063               | 3610 | 2800 | 3033       | 970   | 3444 | 2569  | 1461  | 2333  | 3400       | 4472       | 3534  | 6714       |       |
| n(eggs) crossed with Burrishoole male | 1547               | 1807 | 1400 | 1533       | 508   | 1711 | 1325  | 722   | 1160  | 1800       | 2336       | 1867  | 3381       |       |
| n(eggs) crossed with Owenmore male    | 1516               | 1803 | 1400 | 1500       | 462   | 1733 | 1244  | 739   | 1173  | 1600       | 2136       | 1667  | 3333       |       |
| n(eggs) retained in cavity            | 289                | 234  | 323  | 346        | 77    | 582  | 127   | 277   | 141   | 259        | 581        | 68    | 217        |       |
| Volume of 200 eyed eggs (mls)         | 47.5               | 61.0 | 45.0 | 56.5       | 39.0  | 45.0 | 46.5  | 46.0  | 37.5  | 45.0       | 44.0       | 42.0  | 42.0       |       |
| <b>Local (Burrishoole) Males</b>      |                    |      |      |            |       |      |       |       |       |            |            |       |            |       |
| Sample code                           | BM_2               | BM_3 | BM_5 | BM_4       | BM_7  | BM_8 | BM_11 | BM_12 | BM_13 | BM_14      | BM_10      |       |            |       |
| Date stripped*                        | 22/12 and 29/12/08 |      |      | 22/12/2008 |       |      |       |       |       | 29/12      | 14/01/2009 |       |            |       |
| Fork length (cm)                      | 60.4               | 61.0 | 63.4 | 60.8       | 62.5  | 55.8 | 60.3  | 54.8  | 52.8  | 61.5       | 62.5       |       |            |       |
| Sea age                               | 1SW                | 1SW  | 1SW  | 1SW        | 1SW   | 1SW  | 1SW   | 1SW   | 1SW   | 1SW        | 1SW        |       |            |       |
| <b>Foreign (Owenmore) Females</b>     |                    |      |      |            |       |      |       |       |       |            |            |       |            |       |
| Sample code                           | OF_1               | OF_2 | OF_3 | OF_4       | OF_5  | OF_6 | OF_7  | OF_8  | OF_9  | OF_10      | OF_11      | OF_12 | OF_13      |       |
| Date stripped                         | 22/12/2008         |      |      |            |       |      |       |       |       | 29/12/2008 |            |       | 14/01/2009 |       |
| Fork length (cm)                      | 70.2               | 64.5 | 62.4 | 70.5       | 68    | 64.5 | 77.8  | 60.4  | 61    | 64.9       | 62         | 60    | 64.5       |       |
| Age                                   | 2SW                | 1SW  | 1SW  | 2SW        | 2SW   | 1SW  | 2SW   | 1SW   | 1SW   | 1SW        | 1SW        | 1SW   | 1SW        |       |
| Total n(eggs) per hen                 | 4096               | 4634 | 4270 | 4134       | 3443  | 3829 | 7650  | 3905  | 3279  | 4644       | 3047       | 3796  | 4173       |       |
| Total n(eggs) stripped                | 3904               | 4377 | 4155 | 3719       | 3254  | 3571 | 7386  | 3700  | 3078  | 4427       | 2879       | 3621  | 4133       |       |
| n(eggs) crossed with Owenmore male    | 1904               | 2333 | 2064 | 1756       | 1618  | 1863 | 3719  | 1791  | 1615  | 2291       | 1521       | 1884  | 2089       |       |
| n(eggs) crossed with Burrishoole male | 2000               | 2044 | 2091 | 1963       | 1636  | 1708 | 3667  | 1909  | 1463  | 2136       | 1358       | 1737  | 2044       |       |
| n(eggs) retained in cavity            | 192                | 257  | 115  | 415        | 189   | 258  | 264   | 205   | 201   | 217        | 168        | 175   | 40         |       |
| volume of 200eggs (mls)               | 54.0               | 45.0 | 44.0 | 54.0       | 55.0  | 44.5 | 54.0  | 44.0  | 41.0  | 44.0       | 53.0       | 38.0  | 45.0       |       |
| <b>Foreign (Owenmore) Males</b>       |                    |      |      |            |       |      |       |       |       |            |            |       |            |       |
| Sample code                           | OM_1               | OM_2 | OM_3 | OM_4       | OM_5  | OM_6 | OM_7  | OM_8  | OM_9  | OM_10      | OM_11      | OM_12 | OM_13      | OM_14 |
| Date stripped                         | 22/12/2008         |      |      |            |       |      |       |       |       | 29/12/2008 |            |       | 14/01/2009 |       |
| Fork length (cm)                      | 64.6               | 68.5 | 64.0 | 73.1       | 58.0  | 68.2 | 66.8  | 61.0  | 67.0  | 74.0       | 84.5       | 65.1  | 62.2       | 76.0  |
| Age                                   | 1SW                | 1SW  | 1SW  | 2SW        | 1SW   | 1SW  | 1SW   | 1SW   | 1SW   | 2SW        | 2SW        | 1SW   | 1SW        | 2SW   |

\* These Local females had already shed a fraction of their eggs prior to stripping and hence fewer eggs were stripped; these females are excluded when comparing fecundities (see below).

### **Statistical tests for body size, egg size and fecundity differences among broodstock groups:**

ANOVA analysis showed that Local and Foreign dams did not differ significantly in fork-length  $L_F$  ( $F_{1,23} = 0.37$ ,  $P = 0.55$ ), controlling for the fact that 2SW dams were bigger than 1SW dams ( $F_{1,23} = 56.4$ ,  $P < 0.001$ ). The  $L_F$  difference between 2SW and 1SW dams was not significantly different for Local versus Foreign fish (origin river  $\times$  sea age interaction:  $F_{1,23} = 4.05$ ,  $P = 0.06$ ). Eyed egg volume was larger for 2SW dams ( $F_{1,23} = 18.54$ ,  $P < 0.001$ ) but no different for Local versus Foreign dams ( $F_{1,23} = 0.61$ ,  $P = 0.44$ ), nor was there a significant interaction between origin river and sea age ( $F_{1,23} = 0.67$ ,  $P = 0.42$ ). Foreign females in this sample did not produce any more eggs per kg of body mass compared to Local females ( $F_{1,21} = 0.15$ ,  $P = 0.70$ ), controlling for the fact that 1SW dams produced slightly more (~398) eggs per kg of body mass than 2SW dams ( $F_{1,21} = 5.11$ ,  $P = 0.03$ ). Overall fecundity (total number of eggs per hen) was not different between Local and Foreign dams ( $F_{1,21} = 0.74$ ,  $P = 0.40$ ) and that between 1SW and 2SW dams was marginally non-significant ( $F_{1,22} = 3.46$ ,  $P = 0.08$ ). Foreign 1SW sires were significantly larger than Local 1SW sires ( $F_{1,19} = 10.73$ ,  $P = 0.004$ ) and Foreign 2SW sires were significantly larger than Foreign 1SW sires ( $F_{1,12} = 28.61$ ,  $P < 0.001$ ). There were no 2SW Local sires.
