# Supplementary material for: The signature of fine scale local adaptation in Atlantic salmon revealed from common garden experiments in nature
Source: PubMed Central journal article supplement (PMC4610385; doi:10.1111/eva.12299), 2015-09-11
Supplement: eva0008-0881-sd4.pdf [file eva0008-0881-sd4.pdf]

### Appendix III: Results of the representation GLMMs

Results of the generalised linear mixed-models comparing progeny representation among groups and with respect to other explanatory variables. Group was a factor with four levels: Local<sub>female</sub> x Local<sub>male</sub>, Local<sub>female</sub> x Foreign<sub>male</sub>, Foreign<sub>female</sub> x Local<sub>male</sub> and Foreign<sub>female</sub> x Foreign<sub>male</sub>. Date planted was a factor with three levels: early, mid and late. Dam and sire life-history were each two level factors (1SW versus 2SW). Results are presented as an ANOVA table based on Type II tests, with non-significant terms removed sequentially until all remaining terms were significant at the 5% level. Random effects of dam and sire were included in all models (*Dam* = variance attributable to differences among dams; *Sire* = variance attributable to sires nested within dams; *Res* = residual variance).  $k$  = dispersion parameter from the negative binomial (where the variance =  $\mu + \mu^2/k$ ). All estimates are on log scale. Models were fitted using the glmmPQL function in the MASS library in R (Venables and Ripley 2002).

| Life stage          | Fixed effect                 | NumDF | DenDF | F      | P      | k     | Dam   | Sire  | Res   |  |  |  |  |  |
|---------------------|------------------------------|-------|-------|--------|--------|-------|-------|-------|-------|--|--|--|--|--|
| Pre-flood dispersal | Intercept                    | 1     | 23    | 371.00 | <0.001 | 1.28  | 0.57  | 0.71  | <0.01 |  |  |  |  |  |
|                     | Group                        | 3     | 23    | 3.61   | 0.029  |       |       |       |       |  |  |  |  |  |
|                     | Date planted                 | 2     | 23    | 831.73 | <0.001 |       |       |       |       |  |  |  |  |  |
|                     | <i>Non-significant terms</i> |       |       |        |        |       |       |       |       |  |  |  |  |  |
|                     | Dam $L_F$                    | 1     | 21    | 1.57   | 0.224  |       |       |       |       |  |  |  |  |  |
|                     | Dam life-history             | 1     | 22    | 1.81   | 0.192  |       |       |       |       |  |  |  |  |  |
|                     | Sire life-history            | 1     | 21    | 2.48   | 0.131  |       |       |       |       |  |  |  |  |  |
| Flood migration     | Eyed-egg diameter            | 1     | 22    | 0.31   | 0.581  | 13.29 | 0.02  | 0.03  | 0.76  |  |  |  |  |  |
|                     | Intercept                    | 1     | 26    | 3131   | <0.001 |       |       |       |       |  |  |  |  |  |
|                     | Date planted                 | 2     | 23    | 12.74  | <0.001 |       |       |       |       |  |  |  |  |  |
|                     | <i>Non-significant terms</i> |       |       |        |        |       |       |       |       |  |  |  |  |  |
|                     | Group                        | 3     | 23    | 1.81   | 0.173  |       |       |       |       |  |  |  |  |  |
|                     | Dam $L_F$                    | 1     | 21    | 1.66   | 0.212  |       |       |       |       |  |  |  |  |  |
|                     | Dam life-history             | 1     | 22    | 1.02   | 0.324  |       |       |       |       |  |  |  |  |  |
| Electro-fished parr | Sire life-history            | 1     | 21    | 0.38   | 0.543  | 20.8  | <0.01 | <0.01 | 1.04  |  |  |  |  |  |
|                     | Eyed-egg diameter            | 1     | 22    | 1.02   | 0.323  |       |       |       |       |  |  |  |  |  |
|                     | Intercept                    | 1     | 26    | 2408   | <0.001 |       |       |       |       |  |  |  |  |  |
|                     | Date planted                 | 2     | 23    | 3.86   | 0.036  |       |       |       |       |  |  |  |  |  |
|                     | <i>Non-significant terms</i> |       |       |        |        |       |       |       |       |  |  |  |  |  |
|                     | Group                        | 3     | 23    | 1.05   | 0.390  |       |       |       |       |  |  |  |  |  |
|                     | Dam $L_F$                    | 1     | 22    | 1.25   | 0.276  |       |       |       |       |  |  |  |  |  |
| Presmolts + smolts  | Dam life-history             | 1     | 21    | 0.29   | 0.600  | 5.30  | 0.59  | 1.36  | <0.01 |  |  |  |  |  |
|                     | Sire life-history            | 1     | 21    | 0.29   | 0.600  |       |       |       |       |  |  |  |  |  |
|                     | Eyed-egg diameter            | 1     | 22    | 0.47   | 0.502  |       |       |       |       |  |  |  |  |  |
|                     | Intercept                    | 1     | 26    | 723    | <0.001 |       |       |       |       |  |  |  |  |  |
|                     | Date planted                 | 2     | 23    | 487.30 | <0.001 |       |       |       |       |  |  |  |  |  |
|                     | <i>Non-significant terms</i> |       |       |        |        |       |       |       |       |  |  |  |  |  |
|                     | Group                        | 3     | 22    | 1.56   | 0.228  |       |       |       |       |  |  |  |  |  |
| Adult returns       | Dam $L_F$                    | 1     | 22    | 0.51   | 0.481  | 5.35  | 0.08  | 0.31  | 0.21  |  |  |  |  |  |
|                     | Dam life-history             | 1     | 21    | 2.60   | 0.122  |       |       |       |       |  |  |  |  |  |
|                     | Sire life-history            | 1     | 21    | 1.59   | 0.221  |       |       |       |       |  |  |  |  |  |
|                     | Eyed-egg diameter            | 1     | 25    | 1.81   | 0.191  |       |       |       |       |  |  |  |  |  |
|                     | Intercept                    | 1     | 19    | 253.5  | <0.001 |       |       |       |       |  |  |  |  |  |
|                     | Group                        | 3     | 9     | 15.90  | <0.001 |       |       |       |       |  |  |  |  |  |
| Adult returns       | <i>Non-significant terms</i> |       |       |        |        |       |       |       |       |  |  |  |  |  |
|                     | Dam $L_F$                    | 1     | 18    | 0.51   | 0.483  |       |       |       |       |  |  |  |  |  |
|                     | Dam life-history             | 1     | 17    | <0.001 | 0.985  |       |       |       |       |  |  |  |  |  |
|                     | Sire life-history            | 1     | 7     | 0.89   | 0.376  |       |       |       |       |  |  |  |  |  |

---

|                   |   |   |      |       |
|-------------------|---|---|------|-------|
| Eyed-egg diameter | 1 | 7 | 0.37 | 0.560 |
|-------------------|---|---|------|-------|

---

**References:**

Venables, W. N. & Ripley, B. D. (2002) Modern Applied Statistics with S. Fourth Edition. Springer, New York.
