# Supplementary material for: The signature of fine scale local adaptation in Atlantic salmon revealed from common garden experiments in nature
Source: PubMed Central journal article supplement (PMC4610385; doi:10.1111/eva.12299), 2015-09-11
Supplement: eva0008-0881-sd6.pdf [file eva0008-0881-sd6.pdf]

**Appendix V: Survival of subsampled eyed eggs retained in the hatchery from all families outplanted in the experimental river.**

**Table 1:** Survival of subsampled eyed eggs retained in the hatchery from all families outplanted in the experimental river.

| Vibert No. | Box | Stripping Date | Female Parent | Male Parent | Starting n(eggs) | n(morts) eggs | Date all hatched | n(morts) alveins | n(morts) total | n(with deformities) |
|------------|-----|----------------|---------------|-------------|------------------|---------------|------------------|------------------|----------------|---------------------|
| 1A         |     | 22/12/2008     | OF_6          | OM_1        | 25               | 0             | 18/03/2009       | 0                | 0              | 0                   |
| 1B         |     | 22/12/2008     | OF_5          | OM_2        | 25               | 1             | 20/03/2009       | 0                | 1              | 0                   |
| 2A         |     | 22/12/2008     | OF_4          | OM_3        | 25               | 0             | 20/03/2009       | 0                | 0              | 0                   |
| 2B         |     | 22/12/2008     | OF_3          | OM_4        | 25               | 0             | 20/03/2009       | 0                | 0              | 0                   |
| 3A         |     | 22/12/2008     | OF_2          | OM_5        | 25               | 0             | 20/03/2009       | 0                | 0              | 0                   |
| 3B         |     | 22/12/2008     | OF_7          | OM_6        | 25               | 1             | 20/03/2009       | 1                | 2              | 0                   |
| 4A         |     | 22/12/2008     | OF_1          | OM_7        | 25               | 1             | 20/03/2009       | 0                | 1              | 0                   |
| 4B         |     | 22/12/2008     | OF_8          | OM_8        | 25               | 0             | 20/03/2009       | 0                | 0              | 0                   |
| 5A         |     | 22/12/2008     | OF_8          | BM_2        | 25               | 0             | 20/03/2009       | 0                | 0              | 0                   |
| 5B         |     | 22/12/2008     | OF_3          | BM_3        | 25               | 0             | 20/03/2009       | 0                | 0              | 0                   |
| 6A         |     | 22/12/2008     | OF_2          | BM_4        | 25               | 0             | 23/03/2009       | 0                | 0              | 0                   |
| 6B         |     | 22/12/2008     | OF_7          | BM_7        | 25               | 0             | 23/03/2009       | 0                | 0              | 0                   |
| 7A         |     | 22/12/2008     | OF_4          | BM_8        | 25               | 0             | 23/03/2009       | 0                | 0              | 0                   |
| 7B         |     | 22/12/2008     | OF_6          | BM_11       | 25               | 0             | 23/03/2009       | 0                | 0              | 0                   |
| 8A         |     | 22/12/2008     | OF_5          | BM_12       | 25               | 0             | 20/03/2009       | 0                | 0              | 0                   |
| 8B         |     | 22/12/2008     | OF_1          | BM_13       | 25               | 0             | 20/03/2009       | 0                | 0              | 0                   |
| 9A         |     | 22/12/2008     | BF_4          | BM_2        | 25               | 0             | 18/03/2009       | 0                | 0              | 0                   |
| 9B         |     | 22/12/2008     | BF_5          | BM_3        | 25               | 3             | 20/03/2009       | 0                | 3              | 0                   |

Table 1 continued

| Vibert Box No. | Stripping Date | Female Parent | Male Parent | Starting n(fry) | n(morts) eggs | Date all hatched | n(morts) alveins | n(morts) total | n(with deformities) |
|----------------|----------------|---------------|-------------|-----------------|---------------|------------------|------------------|----------------|---------------------|
| 10A            | 22/12/2008     | BF_2          | BM_4        | 25              | 0             | 20/03/2009       | 0                | 0              | 0                   |
| 10B            | 22/12/2008     | BF_1          | BM_5        | 25              | 0             | 20/03/2009       | 0                | 0              | 0                   |
| 11A            | 22/12/2008     | BF_3          | BM_7        | 25              | 5             | 20/03/2009       | 0                | 5              | 0                   |
| 11B            | 22/12/2008     | BF_7          | BM_8        | 25              | 0             | 20/03/2009       | 0                | 0              | 0                   |
| 12A            | 22/12/2008     | BF_6          | BM_11       | 25              | 7             | 20/03/2009       | 0                | 7              | 0                   |
| 12B            | 22/12/2008     | BF_8          | BM_12       | 25              | 0             | 20/03/2009       | 0                | 0              | 0                   |
| 13A            | 22/12/2008     | BF_9          | BM_13       | 25              | 0             | 23/03/2009       | 0                | 0              | 0                   |
| 13B            | 22/12/2008     | BF_5          | OM_1        | 25              | 0             | 18/03/2009       | 0                | 0              | 1 curved spine      |
| 14A            | 22/12/2008     | BF_9          | OM_2        | 25              | 0             | 23/03/2009       | 0                | 0              | 1 curved spine      |
| 14B            | 22/12/2008     | BF_3          | OM_3        | 25              | 0             | 20/03/2009       | 0                | 0              | 0                   |
| 15A            | 22/12/2008     | BF_8          | OM_4        | 25              | 1             | 20/03/2009       | 0                | 1              | 0                   |
| 15B            | 22/12/2008     | BF_7          | OM_5        | 25              | 0             | 20/03/2009       | 0                | 0              | 0                   |
| 16A            | 22/12/2008     | BF_1          | OM_6        | 25              | 0             | 20/03/2009       | 0                | 0              | 0                   |
| 16B            | 22/12/2008     | BF_4          | OM_7        | 25              | 0             | 20/03/2009       | 1                | 1              | 0                   |
| 17A            | 22/12/2008     | BF_6          | OM_8        | 25              | 1             | 18/03/2009       | 0                | 1              | 0                   |
| 17B            | 22/12/2008     | BF_2          | OM_9        | 25              | 0             | 20/03/2009       | 0                | 0              | 0                   |
| 18A            | 29/12/2008     | OF_11         | OM_10       | 25              | 0             | 25/03/2009       | 0                | 0              | 0                   |
| 18B            | 29/12/2008     | OF_9          | OM_11       | 25              | 0             | 27/03/2009       | 0                | 0              | 0                   |
| 19A            | 29/12/2008     | OF_12         | OM_12       | 25              | 0             | 25/03/2009       | 0                | 0              | 0                   |
| 19B            | 29/12/2008     | OF_10         | OM_13       | 25              | 0             | 25/03/2009       | 0                | 0              | 0                   |
| 20A            | 29/12/2008     | OF_9          | BM_2        | 25              | 0             | 25/03/2009       | 0                | 0              | 0                   |
| 20B            | 29/12/2008     | OF_10         | BM_14       | 25              | 0             | 25/03/2009       | 0                | 0              | 0                   |
| 21A            | 29/12/2008     | OF_11         | BM_3        | 25              | 0             | 25/03/2009       | 0                | 0              | 0                   |
| 21B            | 29/12/2008     | OF_12         | BM_5        | 25              | 0             | 25/03/2009       | 0                | 0              | 0                   |
| 22A            | 29/12/2008     | BF_12         | BM_2        | 25              | 0             | 27/03/2009       | 0                | 0              | 1 curved spine      |
| 22B            | 29/12/2008     | BF_14         | BM_14       | 25              | 0             | 27/03/2009       | 1                | 1              | 0                   |
| 23A            | 29/12/2008     | BF_11         | BM_3        | 25              | 2             | 27/03/2009       | 1                | 3              | 0                   |
| 23B            | 29/12/2008     | BF_11         | OM_10       | 25              | 5             | 25/03/2009       | 0                | 5              | 0                   |
| 24A            | 29/12/2008     | BF_12         | OM_11       | 25              | 5             | 27/03/2009       | 0                | 5              | 0                   |
| 24B            | 29/12/2008     | BF_14         | OM_13       | 25              | 0             | 27/03/2009       | 0                | 0              | 0                   |
| 25A            | 14/01/2009     | BF_13         | BM_10       | 25              | 0             | 22/04/2009       | 0                | 0              | 0                   |
| 25B            | 14/01/2009     | BF_13         | OM_14       | 25              | 0             | 22/04/2009       | 0                | 0              | 0                   |
| 26A            | 14/01/2009     | OF_13         | OM_14       | 25              | 0             | 22/04/2009       | 11               | 11             | 0                   |
| 26B            | 14/01/2009     | OF_13         | BM_10       | 25              | 0             | 22/04/2009       | 24               | 24             | 0                   |

## Statistical analysis of survival from fertilisation to eyed-egg stage in the hatchery

A binomial GLMM (fit using penalised quasi-likelihood with the *glmmPQL* function in the R library *nlme*) including dam and sire as random effects was used to analyse variation in survival (at the full-sib family level) from fertilisation to eyed-egg stage in the hatchery. The response variable was a concatenated vector of the number of surviving eggs and the number non-surviving; all estimates and variance components are on the logit scale. Number of observations: 52; n= 26 dams; n = 25 sires. Group was a factor with four levels: Local<sub>female</sub> x Local<sub>male</sub>, Local<sub>female</sub> x Foreign<sub>male</sub>, Foreign<sub>female</sub> x Local<sub>male</sub> and Foreign<sub>female</sub> x Foreign<sub>male</sub>. Stripping date was a factor with three levels: early, mid and late. Results are presented as an ANOVA table based on Type II tests, with non-significant terms removed sequentially until all remaining terms were significant at the 5% level.

| <i>Random effects:</i> | <i>Variance</i> |  |  |  |
|------------------------|-----------------|--|--|--|
| Dam                    | 0.58            |  |  |  |
| Sire                   | 0.33            |  |  |  |
| Residual               | 4.21            |  |  |  |

  

| <i>Fixed effects:</i>         | <i>NumDF</i> | <i>DenDF</i> | <i>F</i> | <i>P</i> |
|-------------------------------|--------------|--------------|----------|----------|
| Intercept                     | 1            | 26           | 124.0    | <0.001   |
| <i>Non-significant terms:</i> |              |              |          |          |
| Group                         | 3            | 23           | 2.90     | 0.057    |
| Stripping date                | 2            | 21           | 0.27     | 0.763    |
| Dam $L_F$                     | 1            | 20           | 0.06     | 0.811    |
| Dam life-history              | 1            | 23           | 0.84     | 0.368    |
| Sire life-history             | 1            | 22           | 4.10     | 0.055    |
| Eyed-egg diameter             | 1            | 24           | 1.01     | 0.324    |
